# Supplementary material for: Asthma in Inner-City Children at 5–11 Years of Age and Prenatal Exposure to Phthalates: The Columbia Center for Children’s Environmental Health Cohort
Source: PubMed Central journal article supplement (PMC4181924; doi:10.1289/ehp.1307670), 2014-09-17
Supplement: ehp.1307670.s001.508.pdf [file ehp.1307670.s001.508.pdf]

**Supplemental Material**

**Asthma in Inner-City Children at 5-11 Years of Age and Prenatal  
Exposure to Phthalates: The Columbia Center for Children's  
Environmental Health Cohort**

Robin M. Whyatt, Matthew S. Perzanowski, Allan C. Just, Andrew G. Rundle, Kathleen M.  
Donohue, Antonia M. Calafat, Lori A. Hoepner, Frederica P. Perera, and Rachel L. Miller

**Table S1.** Characteristics of study subjects from the Columbia Center for Children’s Environmental Health longitudinal birth cohort included and excluded from the current analyses.

| <b>Characteristics</b>                       | <b>Included (n=300)</b> | <b>Excluded (n=397)</b> | <b>P-value</b>      |
|----------------------------------------------|-------------------------|-------------------------|---------------------|
| <b>Maternal age (years)<sup>a</sup></b>      | 25.3 ± 4.8              | 25.0 ± 5.0 (n=397)      | P=0.32 <sup>d</sup> |
| <b>Maternal asthma history</b>               | 76 (25.3%)              | 67 (20.2%)              | P=0.12 <sup>e</sup> |
| <b>Missing</b>                               | 0                       | 65                      |                     |
| <b>Maternal demoralization<sup>a,b</sup></b> | 1.1 ± 0.65 (n=300)      | 1.2 ± 0.6 (n=353)       | P=0.13 <sup>d</sup> |
| <b>Missing</b>                               | 0                       | 24                      |                     |
| <b>Ethnicity</b>                             |                         |                         |                     |
| African American                             | 107 (35.7%)             | 128 (32.2%)             | P=0.34 <sup>e</sup> |
| Dominican                                    | 193 (64.3%)             | 269 (67.8%)             |                     |
| <b>Maternal education</b>                    |                         |                         |                     |
| < High school                                | 107 (35.7%)             | 134 (34.9%)             | P=0.83 <sup>e</sup> |
| ≥ High school                                | 193 (64.3%)             | 250 (65.1%)             |                     |
| <b>Missing</b>                               | 0                       | 13                      |                     |
| <b>Marital status</b>                        |                         |                         |                     |
| Never married                                | 204 (68.0%)             | 248 (63.4%)             | P=0.21 <sup>e</sup> |
| Ever married <sup>c</sup>                    | 96 (32.0%)              | 143 (36.6%)             |                     |
| <b>Missing</b>                               | 0                       | 6                       |                     |
| <b>Household income</b>                      |                         |                         |                     |
| < 10,000                                     | 122 (44.2%)             | 165 (43.9%)             | P=0.85 <sup>e</sup> |
| ≥ 10,000                                     | 154 (55.8%)             | 202 (55.0)              |                     |
| <b>Missing</b>                               | 24                      | 21                      |                     |
| <b>Sex of the child (% female)</b>           | 163/300 (54.3%)         | 196/397 (49.4%)         | P=0.19 <sup>e</sup> |

<sup>a</sup>Mean ± standard deviation. <sup>b</sup>Mean of 27 items each on 5 point Likert scale (0-4) (Dohrenwend et al. 1978). <sup>c</sup>Includes women living with the same partner for greater than 7 years. <sup>d</sup>Group T-test. <sup>e</sup>Chi-square.

**Table S2.** Associations [relative risk (95% confidence intervals)] between (ln)postnatal phthalate metabolite concentrations and children diagnosed with current asthma compared to non-asthmatics.

| <b>Metabolite</b> | <b>Child age 3<br/>(n=73 cases, 99 controls)</b> | <b>Child age 5<br/>(n=81cases, 112 controls)</b> | <b>Child age 7<br/>(n=59 cases, 57 controls)</b> |
|-------------------|--------------------------------------------------|--------------------------------------------------|--------------------------------------------------|
| MEHHP             | 1.02 (0.85, 1.22)                                | 1.07 (0.92, 1.24)                                | 1.06 (0.91, 1.25)                                |
| MEP               | 1.10 (0.95, 1.26)                                | 1.00 (0.88, 1.13)                                | 0.90 (0.77, 1.05)                                |
| MnBP              | 1.01 (0.82, 1.25)                                | 0.97 (0.83, 1.15)                                | 0.97 (0.81, 1.17)                                |
| MBzP              | 0.97 (0.86, 1.11)                                | 0.98 (0.86, 1.11)                                | 0.96 (0.84, 1.10)                                |

Relative risks were estimated using Poisson regression with robust standard error estimation using the generalized estimating equations controlling for maternal asthma, maternal prenatal demoralization, household tobacco smoke exposures, maternal urinary BPA, maternal urinary specific gravity, child age and child urinary specific gravity at each age point
